# Supplementary material for: Sulfonic Cryogels as Innovative Materials for Biotechnological Applications: Synthesis, Modification, and Biological Activity
Source: MDPI journal article supplement (doi:10.3390/ijms24032949), 2023-02-02
Supplement: s1 [file s1]

## Supplementary Materials

# Sulfonic cryogels as innovative materials for biotechnological applications: synthesis, modification and biological activity

Svetlana Laishevskina<sup>1</sup>, Tatiana Kuleshova<sup>2</sup>, Gayane Panova<sup>2</sup>, Elena Ivan'kova<sup>1</sup>, Olga Iakobson<sup>1</sup>, Anatoly Dobrodumov<sup>1</sup>, Natalia Shevchenko<sup>1</sup> and Alexander Yakimansky<sup>1</sup> \*

<sup>1</sup> Institute of Macromolecular Compounds, Russian Academy of Sciences, Bolshoy pr., 31, Saint-Petersburg, 199004, Russia

<sup>2</sup> Agrophysical Research Institute, Grazhdanskiy pr. 14, Saint-Petersburg, 195220, Russia

\* Correspondence: yakimansky@yahoo.com

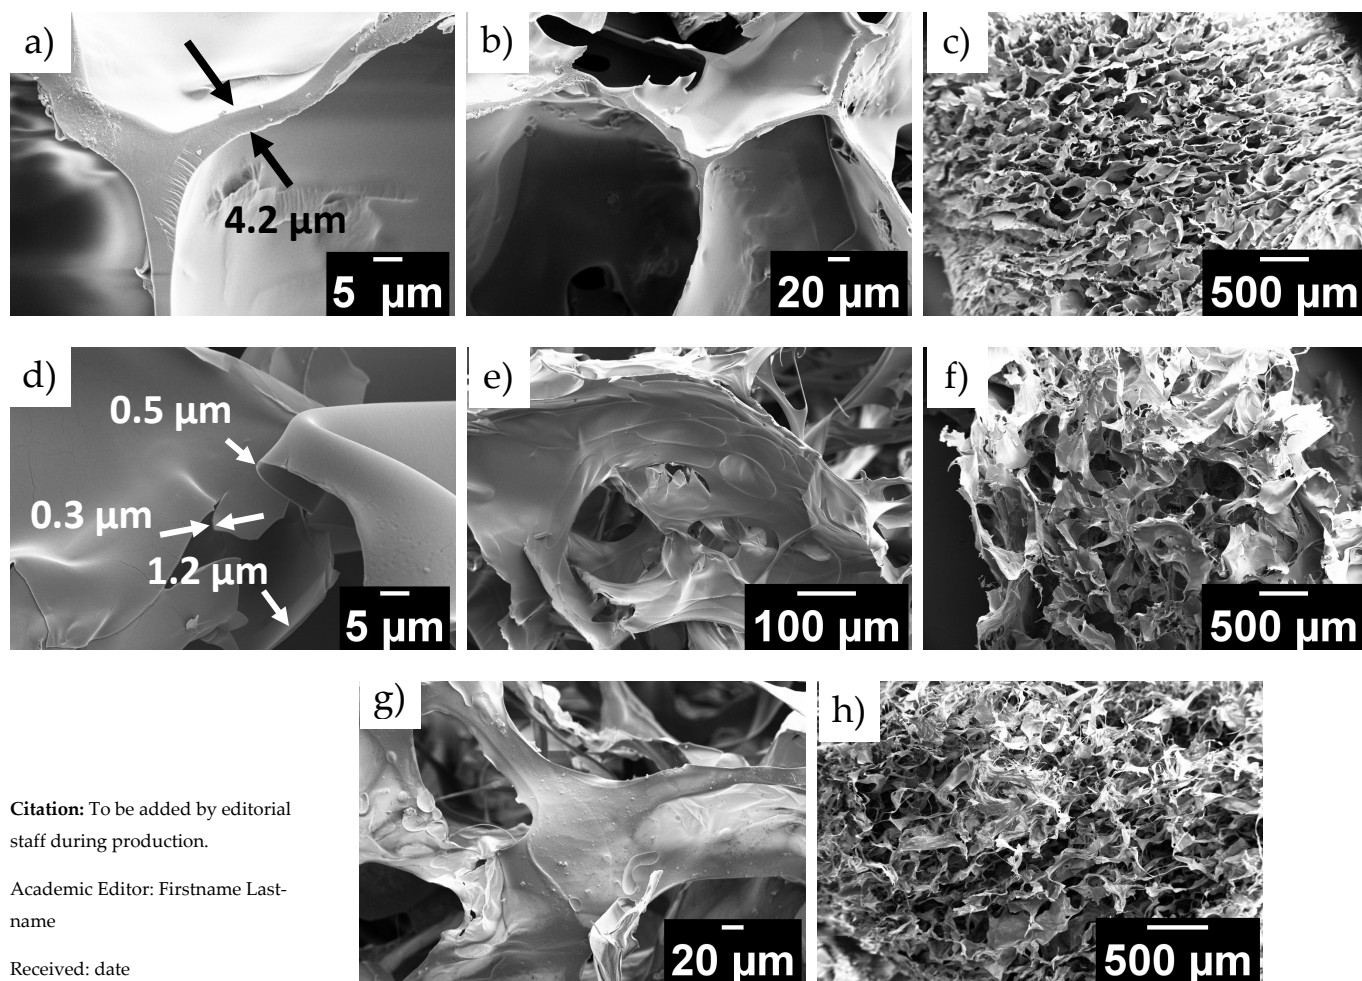

**Citation:** To be added by editorial staff during production.

Academic Editor: Firstname Last-name

Received: date

Accepted: date

Published: date

**Publisher's Note:** MDPI stays neutral with regard to jurisdictional claims in published maps and institutional affiliations.

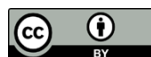

**Copyright:** © 2022 by the authors. Submitted for possible open access publication under the terms and conditions of the Creative Commons Attribution (CC BY) license (<https://creativecommons.org/licenses/by/4.0/>).

**Figure S1.** SEM images of the cryogel 2 (concentration of monomers is 1 mol/L) before swelling (a, b) and after swelling (c, d); cryogel 5 (concentration of monomers is 5 mol/L) after swelling (e, f); cryogel with 3 wt.% of DNDs (g, h).

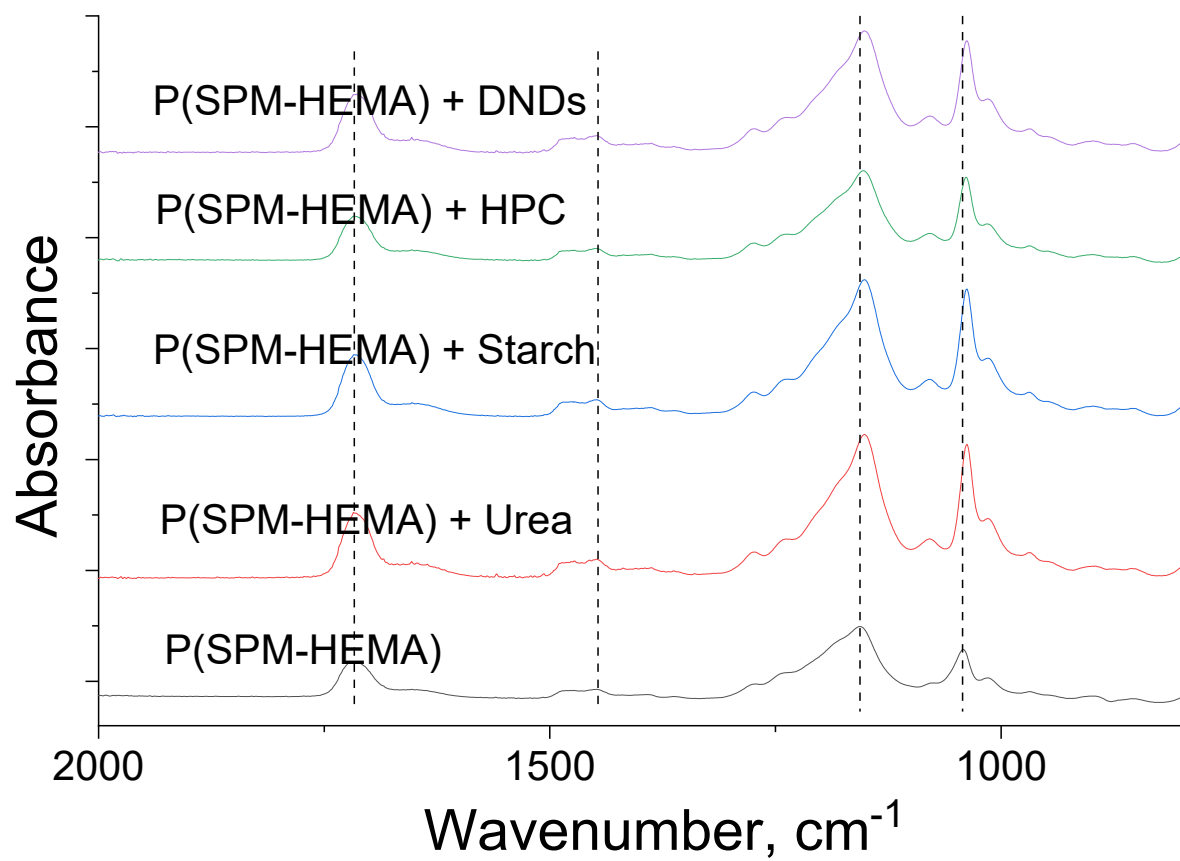

**Figure S2.** FTIR-spectra of P(SPM-HEMA) cryogels with additives.

(a)

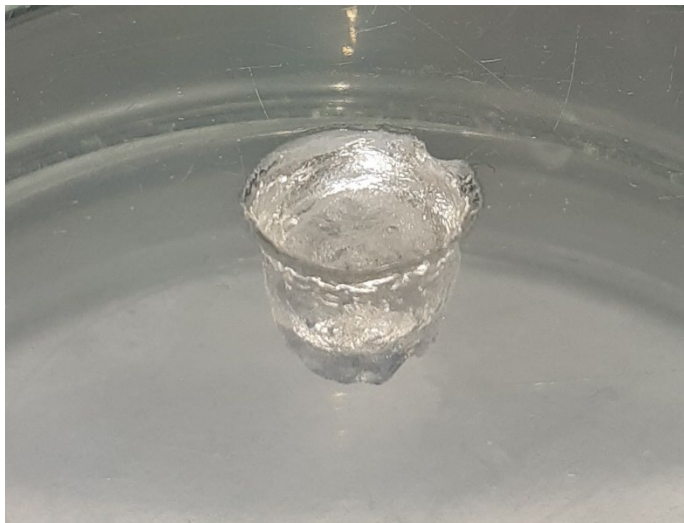

(b)

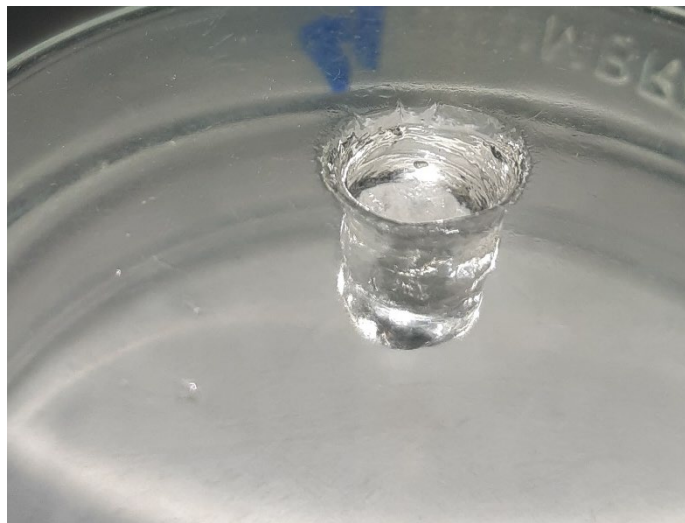

**Figure S3.** The photos of P(SPM-HEMA) hydrogels: initial (a) and with addition of urea (3 wt%) (b)
